# Supplementary material for: Patient-Reported Outcome (PRO) questionnaires for young to middle-aged adults with hip and groin disability: a systematic review of the clinimetric evidence
Source: HighWire-hosted journal article supplement (doi:10.1136/bjsports-2014-094224), 2015-01-13
Supplement: bjsports-2014-094224supp_appendix1.pdf [file bjsports-2014-094224supp_appendix1.pdf]

Supplemental material

Halonen et al.

**“Studying socioeconomic characteristics of residential areas and risk of death: Is choice of spatial unit an issue?”**

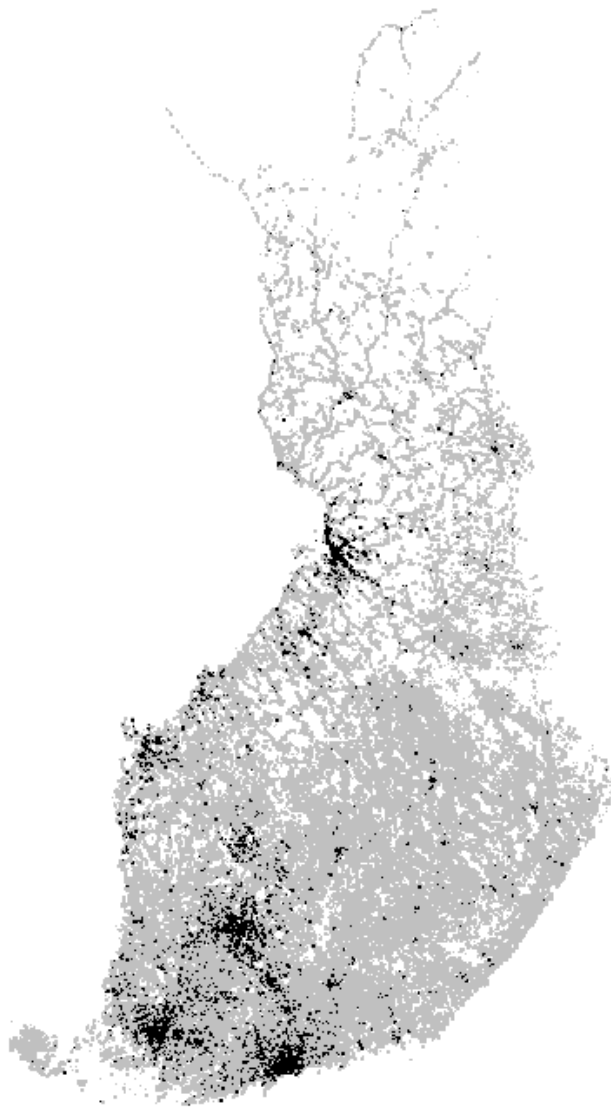

**eFigure 1. Inhabited areas in Finland (grey) and areas in which study participants live (black). Spatial unit 1×1 km square.**

**eTable 1.** Descriptive statistics of individual-level variables.

| <b>Characteristic</b>                 | <b>Statistic</b> | <b>N missing</b> |
|---------------------------------------|------------------|------------------|
| Sex, n (%)                            |                  | -                |
| Men                                   | 36 144 (24.6)    |                  |
| Women                                 | 110 687 (75.4)   |                  |
| Individual occupational status, n (%) |                  | 120              |
| High                                  | 42 789 (29.2)    |                  |
| Intermediate                          | 69 688 (47.5)    |                  |
| Low                                   | 34 234 (23.4)    |                  |
| Individual level of education, n (%)  |                  | -                |
| High                                  | 73 922 (50.3)    |                  |
| Intermediate                          | 52 708 (35.9)    |                  |
| Low                                   | 20 201 (13.8)    |                  |
| Housing tenure, n (%)                 |                  | 2920             |
| Owner                                 | 82 647 (57.4)    |                  |
| Other                                 | 61 262 (42.6)    |                  |
| Median (IQR) age, y                   | 41.0 (32.0-51.0) | -                |
| Median (IQR) time of residence, y     | 6.0 (1.8-12.0)   | -                |
| Median (IQR) follow-up time, y        | 12.0 (11.0-12.0) |                  |

IQR= interquartile (25% - 75%) range

**eTable 2.** Correlations between spatial units for each area characteristic.

| <b>Area characteristics</b>                         | <b>Pearson r</b>            |                              |                                  |                         |
|-----------------------------------------------------|-----------------------------|------------------------------|----------------------------------|-------------------------|
|                                                     | 250 x 250 m<br>vs. 1 x 1 km | 250 x 250m<br>vs. 10 x 10 km | 250 x 250 m<br>vs. Zip-code area | 250 x 250 m<br>vs. Town |
| Socioeconomic deprivation, <i>z-score</i>           | 0.63 *                      | 0.36 *                       | 0.47 *                           | 0.32 *                  |
| Median household income, <i>k€</i>                  | 0.71 *                      | 0.47 *                       | 0.59 *                           | 0.45 *                  |
| Low education, %                                    | 0.66 *                      | 0.37 *                       | 0.53 *                           | 0.32 *                  |
| Unemployment rate, %                                | 0.62 *                      | 0.37 *                       | 0.45 *                           | 0.36 *                  |
| Household crowding, <i>m<sup>2</sup> per person</i> | 0.60 *                      | 0.30 *                       | 0.37 *                           | 0.29 *                  |

\* P-value &lt;0.01
